# Supplementary material for: Systematic and searchable classification of cytochrome P450 proteins encoded by fungal and oomycete genomes
Source: PubMed Central journal article supplement (PMC3505482; doi:10.1186/1471-2164-13-525), 2012-10-04

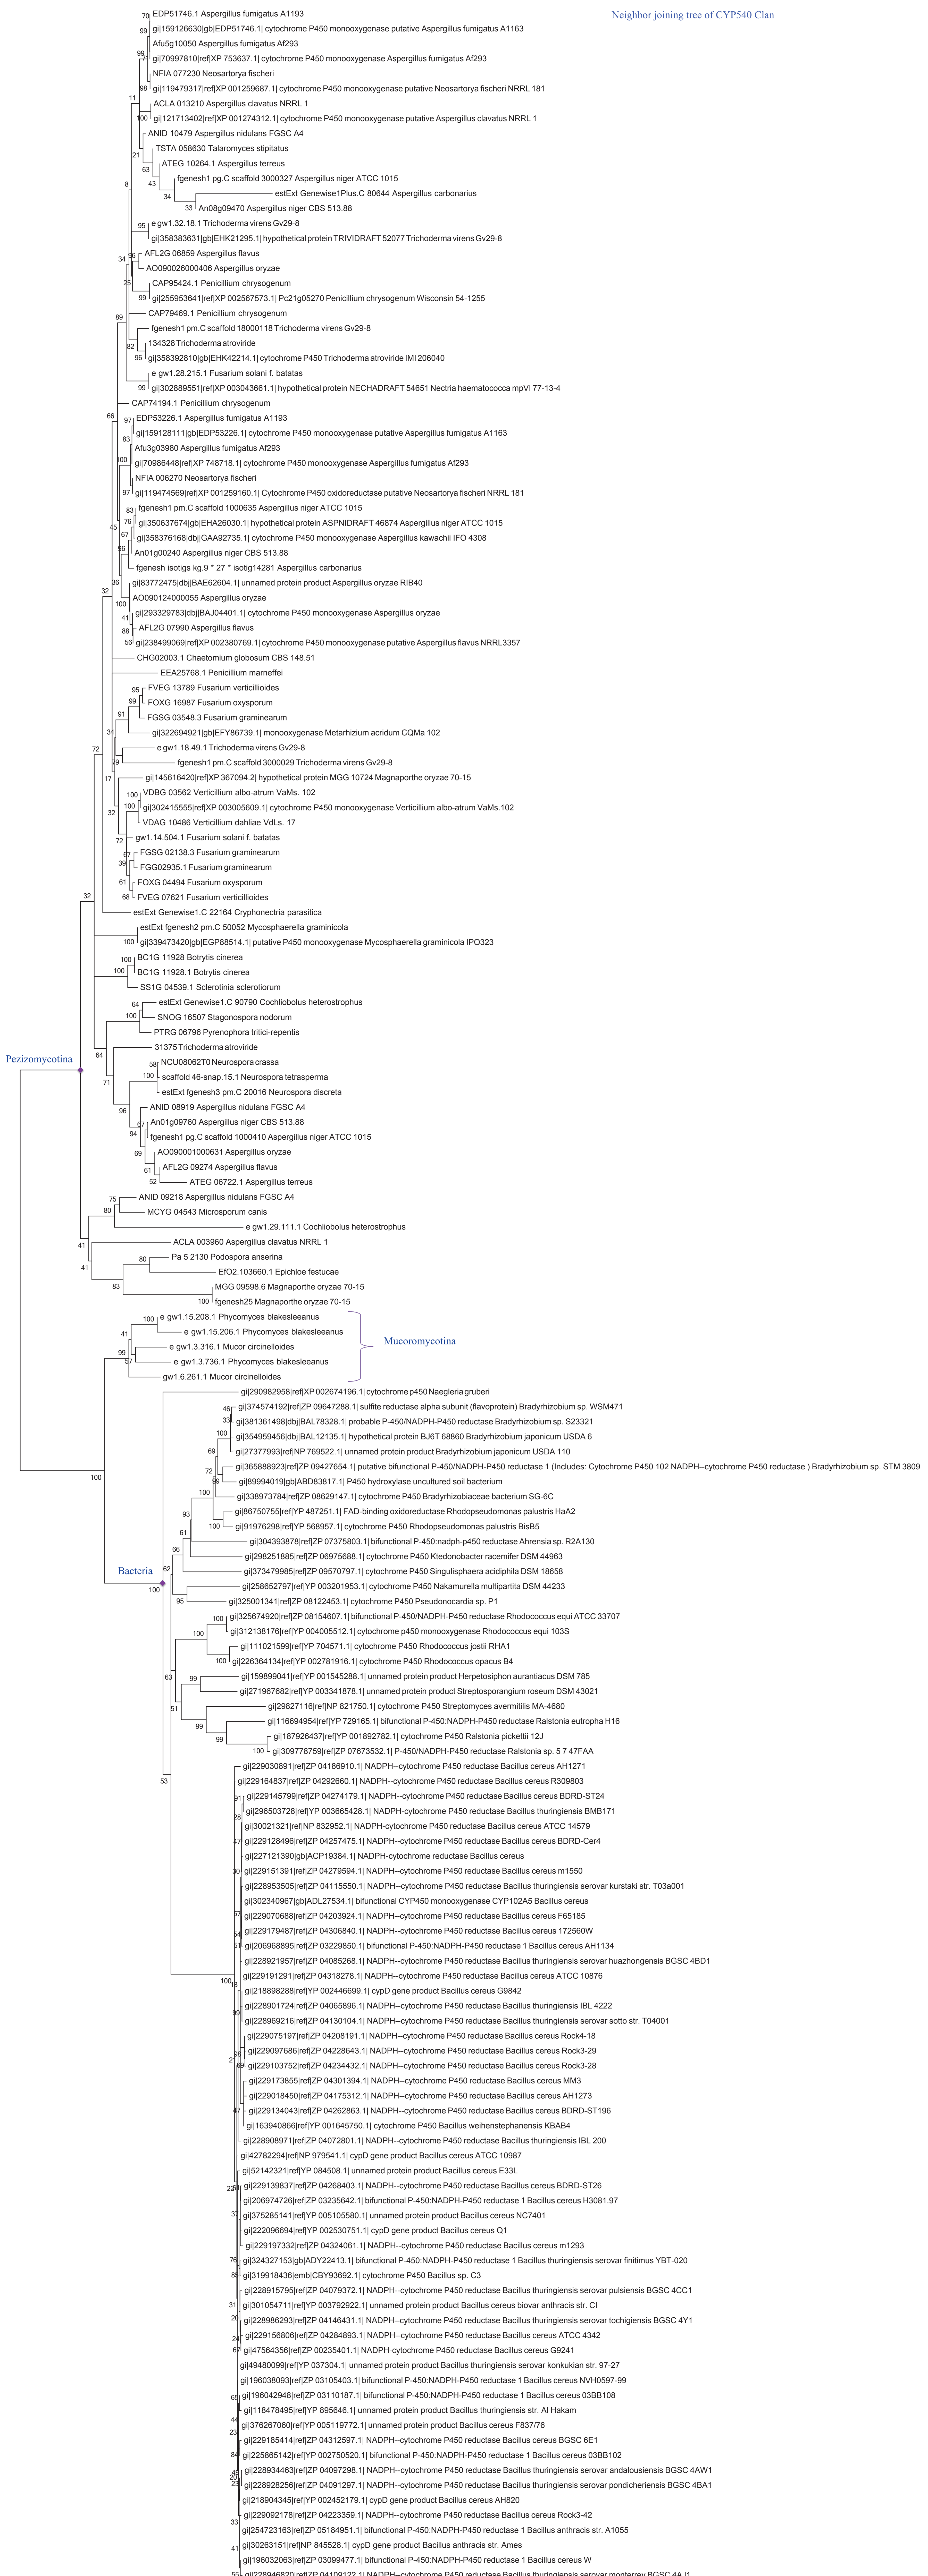

Supplement: 1471-2164-13-525-S18.pdf [file 1471-2164-13-525-S18.pdf]
